## Correction

# Correction: Memory and Fitness Optimization of Bacteria under Fluctuating Environments

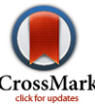

The *PLOS Genetics* Staff

### Notice of Republication

This article was republished on September 30, 2014, to correct errors in the authorship list and citation that were introduced during the typesetting process. The second author's name was spelled incorrectly. Please download this article again to view the correct version. The originally published, uncorrected article and the republished, corrected article are provided here for reference.

### Supporting Information

**File S1.** Originally published, uncorrected article.  
(PDF)

**File S2.** Republished corrected article.  
(PDF)

### Reference

1. Lambert G, Kussel E (2014) Memory and Fitness Optimization of Bacteria under Fluctuating Environments. *PLoS Genet* 10(9): e1004556. doi:10.1371/journal.pgen.1004556

**Citation:** The *PLOS Genetics* Staff (2014) Correction: Memory and Fitness Optimization of Bacteria under Fluctuating Environments. *PLoS Genet* 10(10): e1004793. doi:10.1371/journal.pgen.1004793

**Published** October 16, 2014

**Copyright:** © 2014 The *PLOS Genetics* Staff. This is an open-access article distributed under the terms of the Creative Commons Attribution License, which permits unrestricted use, distribution, and reproduction in any medium, provided the original author and source are credited.
